# Supplementary material
Source: Springer Nature journal article supplement (https://www.springermedizin.de/resource/supplementary/12943_2010_708_MOESM10_ESM.pdf/9554628)

**a**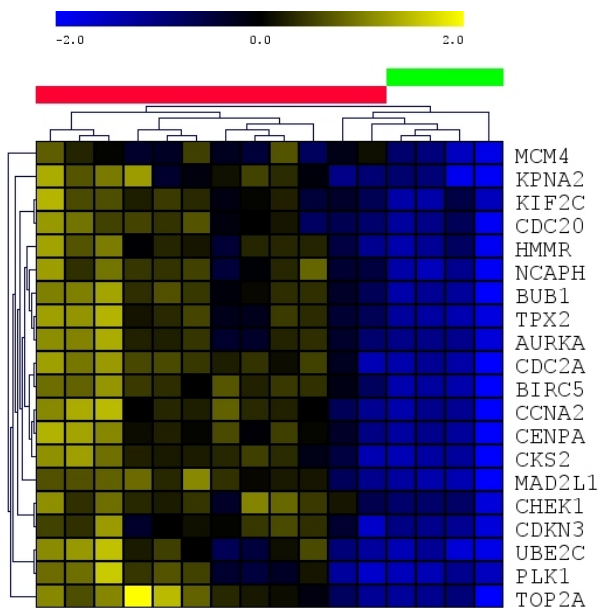**b**

| Method |                 | Normal skin | Tumor | Accuracy (%) |
|--------|-----------------|-------------|-------|--------------|
| SVM    | Predicted class | 5           | 11    | 93.8         |
| USC    |                 | 6           | 10    | 87.5         |
| KNN    |                 | 5           | 11    | 93.8         |
| DAM    |                 | 4           | 12    | 100          |
|        | Real class      | 4           | 12    |              |

Supplement: MOESM10 [file 9554628]
